# Supplementary material for: Maternal Diabetes and Cognitive Performance in the Offspring: A Systematic Review and Meta-Analysis
Source: PubMed Central journal article supplement (PMC4643884; doi:10.1371/journal.pone.0142583), 2015-11-13

## S2 Fig. Subgroup meta-analysis for the IQ measures yielded by (A) Wechsler scales and (B) Stanford-Binet scale.

**A**

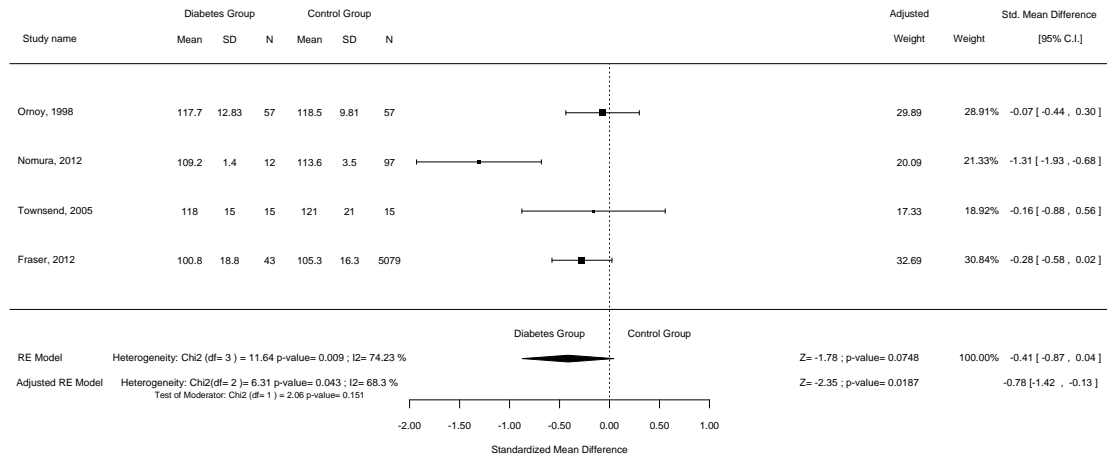

**B**

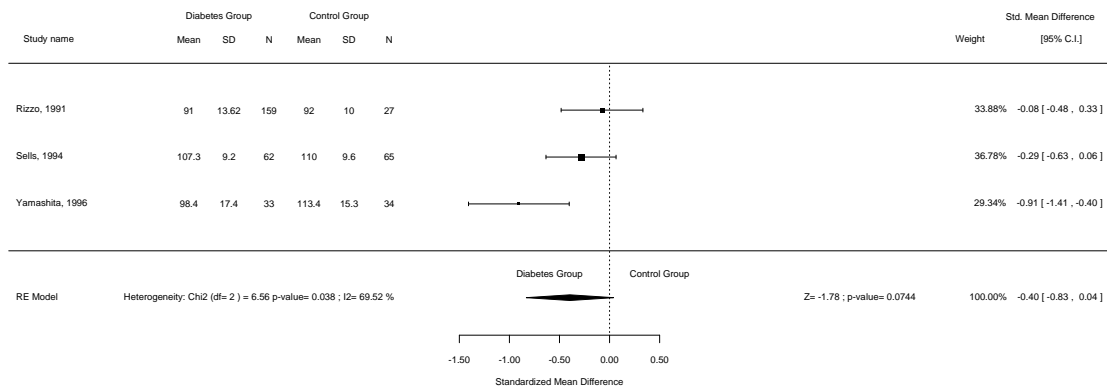

Supplement: pone.0142583.s002.pdf [file pone.0142583.s002.pdf]
