# Supplementary material for: Maternal Diabetes and Cognitive Performance in the Offspring: A Systematic Review and Meta-Analysis
Source: PubMed Central journal article supplement (PMC4643884; doi:10.1371/journal.pone.0142583), 2015-11-13
Supplement: pone.0142583.s003.pdf [file pone.0142583.s003.pdf]

**S1 Table. Quality assessment according to NOS scale.** (<http://www.medicine.mcgill.ca/rtamblyn/Readings/>)

| Reference       | Selection          |                    |                        |                             | Comparability | Outcome    |                     |                       | Final quality score |
|-----------------|--------------------|--------------------|------------------------|-----------------------------|---------------|------------|---------------------|-----------------------|---------------------|
|                 | Representativeness | Non exposed cohort | Exposure ascertainment | Absence of outcome at start |               | Assessment | Length of follow-up | Adequacy of follow-up |                     |
| Fraser 2012     | *                  | *                  | *                      | *                           | *             | *          | *                   | *                     | 8                   |
| Nomura 2012     | *                  | *                  | *                      |                             | **            | *          | *                   |                       | 7                   |
| Hod 1999        | *                  | *                  | *                      |                             | *             | *          |                     |                       | 5                   |
| Yamashita 1996  |                    | *                  | *                      | *                           | *             | *          | *                   |                       | 6                   |
| DeBoer 2005     |                    | *                  | *                      | *                           | *             | *          | *                   | *                     | 7                   |
| Nelson 2003     | *                  | *                  | *                      | *                           | *             | *          | *                   |                       | 7                   |
| Ornoy 1998      | *                  | *                  | *                      | *                           | *             | *          | *                   |                       | 7                   |
| Sells 1994      | *                  | *                  | *                      | *                           | **            | *          | *                   | *                     | 9                   |
| Rizzo 1991      | *                  | *                  | *                      | *                           | *             | *          | *                   | *                     | 8                   |
| Townsend 2005   |                    | *                  | *                      | *                           | *             |            | *                   |                       | 5                   |
| Nelson 2000     |                    | *                  | *                      | *                           | *             | *          | *                   |                       | 6                   |
| De Regnier 2000 |                    | *                  |                        | *                           | *             |            | *                   |                       | 4                   |
