# Supplementary material for: Maternal Diabetes and Cognitive Performance in the Offspring: A Systematic Review and Meta-Analysis
Source: PubMed Central journal article supplement (PMC4643884; doi:10.1371/journal.pone.0142583), 2015-11-13
Supplement: pone.0142583.s004.pdf [file pone.0142583.s004.pdf]

**S2 Table. Risk of bias in included studies according to GRADE approach\*.**

| Study          | Selection | Assessment of exposure | Outcome not present at start | Adjustment for all variables | Assessment of prognostic factors | Assessment of outcome | Follow up | Overall risk of bias |
|----------------|-----------|------------------------|------------------------------|------------------------------|----------------------------------|-----------------------|-----------|----------------------|
| Fraser 2012    | Low       | Low                    | Low                          | Low                          | Low                              | Low                   | Low       | Low                  |
| Nomura 2012    | Low       | Low                    | Low                          | Low                          | Low                              | Low                   | NA        | Low                  |
| Hod 1999       | Low       | Low                    | Low                          | Low                          | Low                              | High                  | NA        | Moderate             |
| Yamashita 1996 | Low       | Low                    | Low                          | High                         | High                             | Low                   | Moderate  | High                 |
| DeBoer 2005    | Low       | Low                    | Low                          | High                         | High                             | Low                   | NA        | High                 |
| Nelson 2003    | Low       | Low                    | Low                          | Low                          | Moderate                         | Low                   | NA        | Low                  |
| Ornoy 1998     | Low       | Low                    | Low                          | Low                          | Low                              | Low                   | NA        | Low                  |
| Sells 1994     | Low       | Low                    | Low                          | Low                          | Low                              | Low                   | Low       | Low                  |
| Rizzo 1991     | Low       | Low                    | Low                          | Low                          | Low                              | Low                   | Low       | Low                  |
| Townsend 2005  | Low       | Low                    | Low                          | Moderate                     | Moderate                         | Low                   | NA        | Moderate             |
| Nelson 2000    | Low       | Low                    | Low                          | High                         | High                             | Low                   | NA        | High                 |
| DeRegnier 2000 | Low       | High                   | Low                          | High                         | High                             | High                  | NA        | High                 |

\* Higgins JPT AD, Sterne. Chapter 8: Assessing risk of bias in included studies. In: Higgins JPT, Green S (editors). Cochrane Handbook for Systematic Reviews of Interventions. Version 5.1.0. 2011.
