# Supplementary material for: Maternal Diabetes and Cognitive Performance in the Offspring: A Systematic Review and Meta-Analysis
Source: PubMed Central journal article supplement (PMC4643884; doi:10.1371/journal.pone.0142583), 2015-11-13
Supplement: pone.0142583.s006.pdf [file pone.0142583.s006.pdf]

**S4 Table. Cumulative analysis for the MDI measures.** These studies included had in common the age of the infants and so, by including the covariate age in the model, the variability due to the factor was taken into account.

| Study          | Estimate | S.E.   | p-values | 95% C.I. Lower Limit | 95% C.I. Upper Limit |
|----------------|----------|--------|----------|----------------------|----------------------|
| Rizzo 1991     | 0.0333   | 0.2021 | 0.8693   | -0.3629              | 0.4294               |
| Sells 1994     | -0.1653  | 0.1709 | 0.3335   | -0.5002              | 0.1696               |
| Hod 1999       | -0.2909  | 0.1743 | 0.0952   | -0.6325              | 0.0508               |
| DeRegnier 2000 | -0.2837  | 0.1333 | 0.0333   | -0.5449              | -0.0224              |
| Nelson 2000    | -0.2747  | 0.1059 | 0.0095   | -0.4823              | -0.0670              |
| Nelson 2003    | -0.3159  | 0.0911 | 0.0005   | -0.4944              | -0.1373              |
| DeBoer 2005    | -0.3452  | 0.0946 | 0.0003   | -0.5307              | -0.1596              |
