# Supplementary material for: Maternal Diabetes and Cognitive Performance in the Offspring: A Systematic Review and Meta-Analysis
Source: PubMed Central journal article supplement (PMC4643884; doi:10.1371/journal.pone.0142583), 2015-11-13
Supplement: pone.0142583.s007.pdf [file pone.0142583.s007.pdf]

**S5 Table. Cumulative analysis of the combined data relative to motor function (PDI).**

| Study          | Estimate | S.E.   | p-values | 95% C.I. Lower Limit | 95% C.I. Upper Limit |
|----------------|----------|--------|----------|----------------------|----------------------|
| Sells 1994     | 0.0188   | 0.1510 | 0.9011   | -0.2772              | 0.3147               |
| Hod 1999       | -0.2698  | 0.3160 | 0.3932   | -0.8892              | 0.3496               |
| DeRegnier 2000 | -0.2384  | 0.2021 | 0.2380   | -0.6345              | 0.1576               |
| Nelson 2000    | -0.1768  | 0.1518 | 0.2440   | -0.4743              | 0.1207               |
| Nelson 2003    | -0.1720  | 0.1104 | 0.1192   | -0.3884              | 0.0444               |
| DeBoer 2005    | -0.2217  | 0.1163 | 0.0567   | -0.4497              | 0.0063               |
