# Supplementary material for: Maternal Diabetes and Cognitive Performance in the Offspring: A Systematic Review and Meta-Analysis
Source: PubMed Central journal article supplement (PMC4643884; doi:10.1371/journal.pone.0142583), 2015-11-13
Supplement: pone.0142583.s009.pdf [file pone.0142583.s009.pdf]

## **S1 Text. Databases search strategy.**

Our search strategy included key terms that are summarized as follows:

#1 ((TITLE-ABS-KEY (“gestational diabetes” OR “diabetic mother” OR “maternal type 1 diabetes mellitus” OR “maternal type 2 diabetes mellitus” OR “diabetes pregnancy”)) AND (TITLE-ABS-KEY (infant\* OR child\* OR baby OR babies OR newborn\* OR toddler\* OR preschool\* OR pre-school\*))).

#2 ((TITLE-ABS-KEY (“gestational diabetes” OR “diabetic mother” OR “maternal type 1 diabetes mellitus” OR “maternal type 2 diabetes mellitus” OR “diabetes pregnancy”)) AND (TITLE-ABS-KEY (“offspring psychomotor function” OR “offspring cognit\*” OR “children cognit\*” OR cognit\*)) AND (TITLE-ABS-KEY (performance OR function OR development)) AND (TITLE-ABS-KEY (“child\* behavior” OR development)) AND (TITLE-ABS-KEY (school OR learning OR academic OR reading OR maths OR brain))).

#3 (TITLE-ABS-KEY (“insulin resistance” OR “insulin pregnancy” OR “insulin gestation”) AND (TITLE-ABS-KEY (infant\* OR child\* OR baby OR babies OR newborn\* OR toddler\* OR preschool\* OR pre-school\*)) AND (TITLE-ABS-KEY (“offspring cognit\*” OR “children cognit\*” OR “cognit\*)) AND (TITLE-ABS-KEY (performance OR function OR development)) AND (TITLE-ABS-KEY (“child\* behavior” OR development) AND (school OR learning OR academic OR reading OR math OR brain))).

#1 AND #2 AND #3.
